# Supplementary material for: What influences home delivery among women who live in urban areas? Analysis of 2014 Ghana Demographic and Health Survey data
Source: PubMed Central journal article supplement (PMC7781474; doi:10.1371/journal.pone.0244811), 2021-01-04
Supplement: pone.0244811.s002.pdf [file pone.0244811.s002.pdf]

# PLOS ONE

## What influences home delivery among women who live in urban areas in Ghana? Analysis of 2014 Ghana Demographic and Health Survey data --Manuscript Draft--

|                              |                                                                                                                                                                                                                                                                                                                                                                                                                                                                                                                                                                                                                                                                                                                                                                                                                                                                                                                                                                                                                                                                                                                                                                                                                                                                                                                                                                                                                                                                                                                                                                                                                                                |
|------------------------------|------------------------------------------------------------------------------------------------------------------------------------------------------------------------------------------------------------------------------------------------------------------------------------------------------------------------------------------------------------------------------------------------------------------------------------------------------------------------------------------------------------------------------------------------------------------------------------------------------------------------------------------------------------------------------------------------------------------------------------------------------------------------------------------------------------------------------------------------------------------------------------------------------------------------------------------------------------------------------------------------------------------------------------------------------------------------------------------------------------------------------------------------------------------------------------------------------------------------------------------------------------------------------------------------------------------------------------------------------------------------------------------------------------------------------------------------------------------------------------------------------------------------------------------------------------------------------------------------------------------------------------------------|
| <b>Manuscript Number:</b>    | PONE-D-20-23864                                                                                                                                                                                                                                                                                                                                                                                                                                                                                                                                                                                                                                                                                                                                                                                                                                                                                                                                                                                                                                                                                                                                                                                                                                                                                                                                                                                                                                                                                                                                                                                                                                |
| <b>Article Type:</b>         | Research Article                                                                                                                                                                                                                                                                                                                                                                                                                                                                                                                                                                                                                                                                                                                                                                                                                                                                                                                                                                                                                                                                                                                                                                                                                                                                                                                                                                                                                                                                                                                                                                                                                               |
| <b>Full Title:</b>           | What influences home delivery among women who live in urban areas in Ghana?<br>Analysis of 2014 Ghana Demographic and Health Survey data                                                                                                                                                                                                                                                                                                                                                                                                                                                                                                                                                                                                                                                                                                                                                                                                                                                                                                                                                                                                                                                                                                                                                                                                                                                                                                                                                                                                                                                                                                       |
| <b>Short Title:</b>          | What influences home delivery among women who live in urban areas in Ghana                                                                                                                                                                                                                                                                                                                                                                                                                                                                                                                                                                                                                                                                                                                                                                                                                                                                                                                                                                                                                                                                                                                                                                                                                                                                                                                                                                                                                                                                                                                                                                     |
| <b>Corresponding Author:</b> | Eugene Budu, M.PHil<br>University of Cape Coast<br>Cape Coast, GHANA                                                                                                                                                                                                                                                                                                                                                                                                                                                                                                                                                                                                                                                                                                                                                                                                                                                                                                                                                                                                                                                                                                                                                                                                                                                                                                                                                                                                                                                                                                                                                                           |
| <b>Keywords:</b>             | Home delivery; Maternal mortality; Ghana; Women's health; Public health; Global health                                                                                                                                                                                                                                                                                                                                                                                                                                                                                                                                                                                                                                                                                                                                                                                                                                                                                                                                                                                                                                                                                                                                                                                                                                                                                                                                                                                                                                                                                                                                                         |
| <b>Abstract:</b>             | <p><b>Background</b></p> <p>The present study investigated factors associated with home delivery among urban women in Ghana. Data for this study were obtained from the 2014 Ghana Demographic and Health Survey.</p> <p><b>Materials and Methods</b></p> <p>We used data of 1,441 women aged 15-49 who had ever given birth and were dwelling in urban areas. By the use of STATA version 14.2, we conducted both descriptive and multivariable logistic regression analyses and tested the results at 95% confidence interval.</p> <p><b>Results</b></p> <p>The study revealed that, compared to women who lived in the Northern region, women who lived in the Brong Ahafo region [AOR=0.38, CI=0.17-0.84] were less likely to deliver at home. The likelihood of home delivery was high among women in the poorest wealth quintile [AOR=2.02, CI=1.06-3.86], women who professed other religions [AOR=3.45; 1.53-7.81], and those who had no ANC visits [AOR=7.17; 1.64-31.3]. Conversely, the likelihood of home delivery was low among women who had attained secondary/higher education [AOR=0.30; 0.17-0.53], compared to those with no formal education.</p> <p><b>Conclusion</b></p> <p>The study identified region of residence, wealth quintile, religion, ANC visits, and educational attainment as predictors of home delivery. Therefore, health promotion programs targeted at home delivery need to focus on these factors. We also recommend that a qualitative study be conducted to investigate the factors responsible for the differences in home delivery in terms of region, as the present study could not do so.</p> |
| <b>Order of Authors:</b>     | <p>Bright Opoku Ahinkorah</p> <p>Abdul-Aziz Seidu</p> <p>Eugene Budu, M.PHil</p> <p>Ebenezer Agbaglo</p> <p>Francis Appiah</p> <p>Collins Adu</p> <p>Edward Kwabena Ameyaw</p>                                                                                                                                                                                                                                                                                                                                                                                                                                                                                                                                                                                                                                                                                                                                                                                                                                                                                                                                                                                                                                                                                                                                                                                                                                                                                                                                                                                                                                                                 |

| Additional Information:                                                                                                                                                                                                                                                                                                                                                                                                                                                                                                                                                                                                                                                                                                                                                                                                                                                                                                                                                                                                                                                                                                                                                                                                                                                                                                                                                             |                                                                     |
|-------------------------------------------------------------------------------------------------------------------------------------------------------------------------------------------------------------------------------------------------------------------------------------------------------------------------------------------------------------------------------------------------------------------------------------------------------------------------------------------------------------------------------------------------------------------------------------------------------------------------------------------------------------------------------------------------------------------------------------------------------------------------------------------------------------------------------------------------------------------------------------------------------------------------------------------------------------------------------------------------------------------------------------------------------------------------------------------------------------------------------------------------------------------------------------------------------------------------------------------------------------------------------------------------------------------------------------------------------------------------------------|---------------------------------------------------------------------|
| Question                                                                                                                                                                                                                                                                                                                                                                                                                                                                                                                                                                                                                                                                                                                                                                                                                                                                                                                                                                                                                                                                                                                                                                                                                                                                                                                                                                            | Response                                                            |
| <p><b>Financial Disclosure</b></p> <p>Enter a financial disclosure statement that describes the sources of funding for the work included in this submission. Review the <a href="#">submission guidelines</a> for detailed requirements. View published research articles from <a href="#">PLOS ONE</a> for specific examples.</p> <p>This statement is required for submission and <b>will appear in the published article</b> if the submission is accepted. Please make sure it is accurate.</p> <p><b>Unfunded studies</b><br/>Enter: <i>The author(s) received no specific funding for this work.</i></p> <p><b>Funded studies</b><br/>Enter a statement with the following details:</p> <ul style="list-style-type: none"> <li>• Initials of the authors who received each award</li> <li>• Grant numbers awarded to each author</li> <li>• The full name of each funder</li> <li>• URL of each funder website</li> <li>• Did the sponsors or funders play any role in the study design, data collection and analysis, decision to publish, or preparation of the manuscript?</li> <li>• <b>NO</b> - Include this sentence at the end of your statement: <i>The funders had no role in study design, data collection and analysis, decision to publish, or preparation of the manuscript.</i></li> <li>• <b>YES</b> - Specify the role(s) played.</li> </ul> <p>* typeset</p> | <p>The author(s) received no specific funding for this work.</p>    |
| <p><b>Competing Interests</b></p> <p>Use the instructions below to enter a competing interest statement for this submission. On behalf of all authors, disclose any <a href="#">competing interests</a> that could be perceived to bias this work—acknowledging all financial support and any other relevant financial or non-financial competing interests.</p>                                                                                                                                                                                                                                                                                                                                                                                                                                                                                                                                                                                                                                                                                                                                                                                                                                                                                                                                                                                                                    | <p>The authors have declared that no competing interests exist.</p> |

This statement **will appear in the published article** if the submission is accepted. Please make sure it is accurate. View published research articles from [PLOS ONE](#) for specific examples.

#### **NO authors have competing interests**

Enter: *The authors have declared that no competing interests exist.*

#### **Authors with competing interests**

Enter competing interest details beginning with this statement:

*I have read the journal's policy and the authors of this manuscript have the following competing interests: [insert competing interests here]*

\* typeset

#### **Ethics Statement**

Enter an ethics statement for this submission. This statement is required if the study involved:

- Human participants
- Human specimens or tissue
- Vertebrate animals or cephalopods
- Vertebrate embryos or tissues
- Field research

Write "N/A" if the submission does not require an ethics statement.

General guidance is provided below. Consult the [submission guidelines](#) for detailed instructions. **Make sure that all information entered here is included in the Methods section of the manuscript.**

The survey reported that ethical approval was granted by the Institutional Review Board of ICF International and Ethical Review Committee of Ghana Health Service (Ghana Statistical Service, Ghana Health Service & ICF Macro, 2015). We further obtained permission from the DHS Program for use of this data for the study. Data is available on [https:// https://dhsprogram.com/data/dataset](https://dhsprogram.com/data/dataset)

**Format for specific study types**

**Human Subject Research (involving human participants and/or tissue)**

- Give the name of the institutional review board or ethics committee that approved the study
- Include the approval number and/or a statement indicating approval of this research
- Indicate the form of consent obtained (written/oral) or the reason that consent was not obtained (e.g. the data were analyzed anonymously)

**Animal Research (involving vertebrate animals, embryos or tissues)**

- Provide the name of the Institutional Animal Care and Use Committee (IACUC) or other relevant ethics board that reviewed the study protocol, and indicate whether they approved this research or granted a formal waiver of ethical approval
- Include an approval number if one was obtained
- If the study involved *non-human primates*, add *additional details* about animal welfare and steps taken to ameliorate suffering
- If anesthesia, euthanasia, or any kind of animal sacrifice is part of the study, include briefly which substances and/or methods were applied

**Field Research**

Include the following details if this study involves the collection of plant, animal, or other materials from a natural setting:

- Field permit number
- Name of the institution or relevant body that granted permission

**Data Availability**

Authors are required to make all data underlying the findings described fully available, without restriction, and from the time of publication. PLOS allows rare exceptions to address legal and ethical concerns. See the [PLOS Data Policy](#) and [FAQ](#) for detailed information.

Yes - all data are fully available without restriction

A Data Availability Statement describing where the data can be found is required at submission. Your answers to this question constitute the Data Availability Statement and **will be published in the article**, if accepted.

**Important:** Stating 'data available on request from the author' is not sufficient. If your data are only available upon request, select 'No' for the first question and explain your exceptional situation in the text box.

Do the authors confirm that all data underlying the findings described in their manuscript are fully available without restriction?

**Describe where the data may be found in full sentences. If you are copying our sample text, replace any instances of XXX with the appropriate details.**

- If the data are **held or will be held in a public repository**, include URLs, accession numbers or DOIs. If this information will only be available after acceptance, indicate this by ticking the box below. For example: *All XXX files are available from the XXX database (accession number(s) XXX, XXX).*
- If the data are all contained **within the manuscript and/or Supporting Information files**, enter the following: *All relevant data are within the manuscript and its Supporting Information files.*
- If neither of these applies but you are able to provide **details of access elsewhere**, with or without limitations, please do so. For example:

*Data cannot be shared publicly because of [XXX]. Data are available from the XXX Institutional Data Access / Ethics Committee (contact via XXX) for researchers who meet the criteria for access to confidential data.*

*The data underlying the results presented in the study are available from (include the name of the third party*

Data is available on [https:// https://dhsprogram.com/data/dataset](https://dhsprogram.com/data/dataset)

*and contact information or URL).*

- This text is appropriate if the data are owned by a third party and authors do not have permission to share the data.

\* typeset

Additional data availability information:

# 1 What influences home delivery among women who live in 2 urban areas in Ghana? Analysis of 2014 Ghana Demographic 3 and Health Survey data

4  
5 Bright Opoku Ahinkorah<sup>1</sup>, Abdul-Aziz Seidu<sup>2\*</sup>, Eugene Budu<sup>2</sup>, Ebenezer Agbaglo<sup>3</sup>, Francis  
6 Appiah<sup>2</sup> Collins Adu<sup>4</sup>, Edward Kwabena Ameyaw<sup>1</sup>

7  
8 <sup>1</sup>The Australian Centre for Public and Population Health Research (ACPPHR), Faculty of Health,  
9 University of Technology Sydney, Australia

10 <sup>2</sup>Department of Population and Health, University of Cape Coast, Cape Coast, Ghana

11 <sup>3</sup>Department of English, University of Cape Coast, Cape Coast, Ghana

12 <sup>4</sup>Department of Health Promotion and Disability Study, Kwame Nkrumah University of Science  
13 and Technology, Kumasi, Ghana

14 \*Corresponding author

15 Email addresses:

16 BOA: [brightahinkorah@gmail.com](mailto:brightahinkorah@gmail.com)

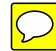

17 \*AS: [abdul-aziz.seidu@stu.ucc.edu.gh](mailto:abdul-aziz.seidu@stu.ucc.edu.gh)

18 EB: [budueugene@gmail.com](mailto:budueugene@gmail.com)

19 EA: [ebenezer.agbaglo@stu.ucc.edu.gh](mailto:ebenezer.agbaglo@stu.ucc.edu.gh)

20 FA: [engman477@yahoo.com](mailto:engman477@yahoo.com)

21 CA: [collinsadu80@yahoo.com](mailto:collinsadu80@yahoo.com)

22 EKA: [edmeyaw19@gmail.com](mailto:edmeyaw19@gmail.com)

23  
24  
25  
26  
27  
28  
29  
30  
31  
32  
33  
34  
35  
36  
37  
38  
39  
40  
41  
42  
43  
44

45 **Abstract**

46 **Background**

47 The present study investigated factors associated with home delivery among urban women in  
48 Ghana. Data for this study were obtained from the 2014 Ghana Demographic and Health Survey.

49 **Materials and Methods**

50 We used data of 1,441 women aged 15-49 who had ever given birth and were dwelling in urban  
51 areas. By the use of STATA version 14.2, we conducted both descriptive and multivariable logistic  
52 regression analyses and tested the results at 95% confidence interval.

53 **Results**

54 The study revealed that, compared to women who lived in the Northern region, women who lived  
55 in the Brong Ahafo region [AOR=0.38, CI=0.17-0.84] were less likely to deliver at home. The  
56 likelihood of home delivery was high among women in the poorest wealth quintile [AOR=2.02,  
57 CI=1.06-3.86], women who professed other religions [AOR=3.45; 1.53-7.81], and those who had  
58 no ANC visits [AOR=7.17; 1.64-31.3]. Conversely, the likelihood of home delivery was low  
59 among women who had attained secondary/higher education [AOR=0.30; 0.17-0.53], compared  
60 to those with no formal education.

61 **Conclusion**

62 The study identified region of residence, wealth quintile, religion, ANC visits, and educational  
63 attainment as predictors of home delivery. Therefore, health promotion programs targeted at home  
64 delivery need to focus on these factors. We also recommend that a qualitative study be conducted  
65 to investigate the factors responsible for the differences in home delivery in terms of region, as the  
66 present study could not do so.

67  
68 **Keywords:** Home delivery; Maternal mortality; Ghana; Women's health; Public health;  
69 Global health

70  
71  
72 **Background**

73 One issue that has always been of public health concern is high maternal mortality. Because of  
74 this, the international community has always placed premium on reducing maternal mortality. For  
75 example, the then Millennium Development Goals (MDGs) aimed at reducing maternal mortality  
76 by 75% by the year 2015 [1,2]. While this aim saw a significant decline in maternal mortality rates  
77 in countries all over the world, Ghana could not achieve this target, as maternal mortality reduced  
78 only by 45% by the end of 2015 [3]. After the MDGs came the Sustainable Development Goals  
79 (SDGs), which also targets improvements in women's health, including reduction of maternal  
80 mortality. Specifically, target 3.1 of the SDGs aims at reducing the global maternal mortality ratio  
81 to less than 70 per 100,000 live births by the year 2030 [4,5]. Despite this, the world still struggles  
82 with maternal mortality, with sub-Saharan African countries disproportionately affected [5], with  
83 351 per 100,000 live births [6]. In the context of Ghana, as of 2017, the maternal mortality ratio  
84 stood at 310 deaths per 100,000 births [7]

85 A larger percentage of maternal mortalities in Ghana is caused by pregnancy-related issues  
86 such as obstetric complications, which result in death during pregnancy, childbirth, or within 42  
87 days after delivery [5]. This implies that maternal mortality can be reduced by ensuring that women



88 have better maternal healthcare services, including skilled birth delivery [5]. Over the years, the  
89 government of Ghana has attempted to improve access to maternal healthcare services. In 2003,  
90 the government, for example, introduced the waiver of delivery fees, and by 2005, fees on delivery  
91 care were abolished in all the then 10 regions of the country [8]. This was followed by the  
92 introduction of the National Health Insurance Scheme (NHIS) in 2005. The NHIS allows all  
93 pregnant women under the scheme to have free access to maternal healthcare services, including  
94 antenatal care, delivery services, postnatal care, and neonatal care [9]. This program saw a decrease  
95 in home delivery from 45% in 2007 to 20% in 2017 [7]. However, there are rural-urban  
96 differentials in terms of home delivery, with the prevalence of home delivery in rural areas being  
97 40%, as compared to 10.2% in urban areas [10]. Besides, 9% of women in urban areas are likely  
98 to deliver without a skilled provider [11].

99 While the prevalence of home delivery appears to be relatively low in Ghana, there are still  
100 some barriers that obstruct women from using skilled birth attendants, despite the waiver of  
101 delivery fees, and this consequently puts women at increased risk of infections and maternal  
102 mortality [12, 13]. In view of this, more efforts are needed to significantly reduce maternal  
103 mortality in Ghana, if the country is to achieve the objectives of SDG 3.1. To this end, it is needful  
104 to reveal factors associated with home delivery, as such factors will provide useful information to  
105 interventions aimed at reducing maternal mortality in Ghana. In Ghana, a few studies have been  
106 conducted in this regard. Studies by Ganle et al. [14] and Boah et al. [15] in Northern Ghana and  
107 the Builsa South District of the Upper West region, respectively, identified fewer antenatal care  
108 visits, lack of health insurance, living in a male-headed household, being unexposed to media,  
109 parity, poor attitude of nurses, lack of transportation, cost of delivery kits, and traditional beliefs  
110 and practices as predictors of home delivery. However, these studies focused more on rural areas,  
111 ignoring the fact that a considerable number of women in urban areas still use home delivery  
112 services. The present study departs from previous ones by assessing the factors associated with  
113 home delivery in urban Ghana.

## 114 **Materials and Methods**

### 115 **Data source**

116 The study used data from the 2014 Demographic and Health Survey (DHS) of Ghana. DHS is a  
117 nationwide survey collected every five-year period across low- and middle-income countries.  
118 Women's file was used for this study and contains the responses by women aged 15 and 49. The  
119 survey targets core maternal and child health indicators such as unintended pregnancy,  
120 contraceptive use, skilled birth attendance, immunisation among under-fives, and intimate partner  
121 violence. Stratified dual-stage sampling approach was employed and the same questions were  
122 posed to all women. Selection of clusters (i.e. enumeration areas [EAs]) is the first step in the  
123 sampling process, followed by systematic household sampling within the selected EAs. The  
124 second step involves the selection of households from the predefined clusters. For the purpose of  
125 this study, only women in the urban areas who had ever given birth and had complete cases on all  
126 the variables considered for the study were included (N=1,441). Details of the methodology  
127 employed by the GDHS can be found in the final report [16]. We relied on the Strengthening the  
128 "Reporting of Observational Studies in Epidemiology" (STROBE) statement in writing the  
129 manuscript.

130  
131  
132

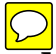

## 133 **Study variables definition**

### 134 **Outcome variable**

135 The outcome variable employed for this study was “home delivery” which was obtained from the  
136 question, “Where did you deliver?” Responses to this question were coded respondent’s home,  
137 other home, government hospital, government health centre/clinic, government health post/CHPS,  
138 other public, private hospital/clinic, **maternity homes** and others. It was then dichotomised into  
139 facility delivery= 0 and home delivery=1, where respondent’s home and other home were group  
140 as “home delivery” and all the other categories were grouped as “facility delivery.”

### 141 **Explanatory variables**

142 The study considered twelve explanatory variables. These are age, region, religion, ethnicity,  
143 educational level, marital status, wealth status, employment, parity, sex of household head,  
144 antenatal visits, and decision-making for healthcare. These variables were not determined a priori;  
145 instead, they were determined based on parsimony, theoretical relevance, and practical  
146 significance with place of delivery [17, 18,19]. The categorization of the variables can be found in  
147 Table 1.

### 148 **Statistical analysis**

149 The statistical software STATA version 14.0 was used to process the data. Both bivariate and  
150 multivariate analyses were employed in this study and results were tested at 95% confidence  
151 interval. Bivariate analysis was conducted to show the proportion of home deliveries across socio-  
152 demographic characteristics with their significance levels and chi-square values ( $\chi^2$ ). Multivariate  
153 analysis (binary logistic regression) was further conducted. Only the variables that showed  
154 statistical significance in the bivariate analysis were used for the regression analysis. Before the  
155 binary logistic regression analysis, we conducted a multicollinearity test of all the statistically  
156 significant variables using the variance inflation factor (VIF), and it showed no evidence of  
157 collinearity among the explanatory variables (Mean VIF=1.32, Max VIF=1.57, Minimum=1.02).  
158 The results were presented as adjusted odds ratios, with their corresponding 95% confidence  
159 intervals signifying their level of precision. Statistical significance was declared at  $p < 0.05$ . Sample  
160 weight was applied and the survey command (svy) was used to account for the complex sampling  
161 design of the survey.

### 162 **Ethical Approval**

163 The survey reported that ethical approval was granted by the Institutional Review Board of ICF  
164 International and Ethical Review Committee of Ghana Health Service (Ghana Statistical Service,  
165 Ghana Health Service & ICF Macro, 2015). We further obtained permission from the DHS  
166 Program for use of this data for the study. Data is available on [https://](https://dhsprogram.com/data/dataset)  
167 <https://dhsprogram.com/data/dataset>

168

## 169 **Results**

### 170 **Distribution of the prevalence of home deliveries among women in the urban** 171 **areas**

172 Table 1 presents results on the distribution of the prevalence of home deliveries among women in  
173 the urban areas of Ghana across socio-demographic characteristics. The prevalence of home  
174 deliveries in the country was 7.9%, with variations across the various socio-demographic  
175 characteristics of the respondents. The results of the chi-square test showed that region, ethnicity,

176 educational level, wealth index, parity, religion, and ANC visits had significant associations with  
177 home delivery ( $p < 0.001$ ).

178 **\*\*\*Table 1\*\*\***

179  
180 **Predictors of home delivery among women in the urban areas of**  
181 **Ghana**

182 Table 2 shows results on the predictors of home delivery among women in the urban areas of  
183 Ghana. Compared to women who lived in the Northern region, women who lived in the Brong  
184 Ahafo region [AOR=0.38, CI=0.17-0.84] were less **likely to deliver at home**. Women with poorest  
185 wealth quintile were more likely to deliver at home, compared to those with middle wealth quintile  
186 [AOR=2.02, CI=1.06-3.86]. The likelihood of home delivery was high among women who  
187 professed other religions, compared to Christians [AOR=3.45; 1.53-7.81]. Home delivery was  
188 found to be high among women who had no ANC visits, compared to those who had at least one  
189 ANC visit [AOR=7.17; 1.64-31.3]. Conversely, the likelihood of home delivery was low among  
190 women who had attained secondary/higher education [AOR=0.30; 0.17-0.53], compared to those  
191 with no formal education.

192 **\*\*\*Table 2\*\*\***

193 **Discussion**

194 Home delivery presents an array of negative health complications to the mother and the child;  
195 hence, ensuring health facility delivery has the potential to avert such risks [5]. Therefore, the  
196 primary focus of our study was to assess the factors associated with home delivery in urban Ghana.  
197 Our study revealed that, compared to all the regions, women who lived in the Northern region  
198 were more likely to deliver at home. Debatably, health facilities in Ghana are not equally  
199 distributed, and disfavours some regions. Typically, the northern part of the country is less  
200 endowed with health facilities [20, 21].

201 Several studies have further remarked that accessibility and availability of quality maternal  
202 health services influence the use of an institution for delivery [22, 23,24,25,26]. Shahabuddin et  
203 al. [27] similarly noted that young women from mountain region Nepal were less likely to choose  
204 institutional delivery, compared with women in the Terai region. This implies that, without  
205 equitable distribution of health facilities and elimination of accessibility barriers including  
206 provision of efficient and effective referral services, health facility delivery will be cumbersome  
207 for most women in Ghana who are in the disadvantaged regions.

208 We found that women with poorest wealth quintile had higher odds to deliver at home,  
209 compared to those with middle wealth quintile. Our results is in line with previous studies in other  
210 low- and middle-income countries such as Nepal [27], Malawi [28] and Guinea-Bissau [29]. It is  
211 increasingly known that wealthier women are more likely to deliver in healthcare facilities than  
212 their poorer counterparts [30, 31, 32]. What might have caused this disparity in institutional  
213 delivery among the rich and the poor could possibly be attributed to financial stands. Poor women  
214 might be challenged financially when there is the need to deliver in a health facility, including the  
215 cost of transport and buying other items needed for delivery.

216 Our study also revealed that those who professed other religions had higher propensity to  
217 home delivery, compared to Christians. Religious affiliation was responsible for the disparity in  
218 institutional delivery in other studies. For instance, in Nepal, Shahabuddin et al. [27] observed that  
219 young Muslim women were 1.82 times more likely to deliver at an institution, compared with  
220 young Hindu women. We must acknowledge that religious affiliation comes with specific beliefs

221 and practices, which may influence women's general practices including opting health facility  
222 delivery [14,15]. Our study fails to unravel why women from other religious backgrounds were  
223 more likely to deliver at home, compared to Christians. We, therefore, suggest that a qualitative  
224 study be done between religion and place of delivery to understand the phenomenon better.

225 It is common knowledge that ANC utilisation has a spilt over effect on mothers' choice of  
226 place of delivery, whereby women who utilize ANC mostly prefer institutional delivery supervised  
227 by health professionals [33,34]. As such, it was not surprising that home delivery was found to be  
228 high among women who had no ANC visits, as compared to those who had at least one ANC visit  
229 in our current study. A systematic review in assessing factors influencing utilisation of maternal  
230 health services by adolescent mothers in low- and middle-income countries concluded that the use  
231 of antenatal care predicted use of skilled birth attendance, and use of both predicted use of postnatal  
232 care [35]. Practically, it is suggestive that sufficient ANC utilisation is likely to increase pregnant  
233 women's awareness of possible complications and safe delivery practices, which consequently  
234 urges them to deliver in a health facility [36, 37, 38, 39]. It has also been argued that women who  
235 visit health facilities for healthcare services including ANC check-ups might be exposed to  
236 counselling and guidance from health professionals [40]. Both scenarios enlighten them about the  
237 dangers associated with home deliveries. Theoretically, following the proposition raised by the  
238 protection motivation theory (PMT), women, having been exposed to vital information during  
239 ANC, will opt for delivering at a health facility to serve as a protection against unforeseen  
240 predicaments associated with home delivery [41, 42, 43].

241 Finally, we noted that the probability to deliver at home was low among women who had  
242 attained secondary/higher level of education, compared to those with no formal education.  
243 Similarly, studies in Malawi observed that women who had no formal education were about four-  
244 fold probable to deliver at home, compared to women who had attained secondary or higher level  
245 [28]. In a related study, Yaya, Bishwajit, and Gunawardena [29] also found that, among residents  
246 in urban areas of Guinea-Bissau, compared those who had no education, those who had primary  
247 and secondary/higher level of education were 2.2 and 3.3 times more likely to deliver at a health  
248 facility. Level of education has been a determinant to home delivery in Zambia as well, and it was  
249 known that women who had four years of schooling or less were 63 percent more likely to deliver  
250 at home than a health facility, compared to those who had at least five years of schooling. A recent  
251 study also found that having education increases the likelihood that a woman would decide to  
252 deliver her baby in a hospital or maternity home than at home or in other places [44]. Oyedele [44]  
253 further explained that education increases individuals' awareness about health holistically and  
254 exposes them to benefits associated with complication prevention. Therefore, we can argue that  
255 the educated Ghanaians would be compelled to live a sanitary and hygienic life including opting  
256 institutional delivery.

257  
258

## 259 **Strengths and limitations**

260 Among the strengths of the study is the fact that it depended on a nationally representative data  
261 set. Also, the study adopted probability method in selecting survey respondents and used sound  
262 analytical procedure which enhances the robustness of the results. However, our results should be  
263 interpreted with caution since causality cannot be established.

264  
265

## 266 **Conclusion**

267 The major determinants of home delivery among urban residents observed in our study were region  
268 of residence, wealth quintile, religion of affiliation, ANC visits, and educational attainment. What  
269 might have compelled Northern residents to be inclined to home delivery calls for health education  
270 emphasising health facility delivery while prioritising health facility delivery on policy initiatives.  
271 Women should be empowered to utilise ANC, using sufficient counselling, guidance, and mass  
272 sensitisation through various mass media platforms. Disparity in health facility delivery masked  
273 by religion of affiliation calls for a qualitative study to interrogate the phenomenon.

274

## 275 **Abbreviations**

276 ANC: Antenatal Care; AOR: Adjusted Odds Ratio; CI: Confidence Interval; DHS: Demographic  
277 and Health Surveys; MMR: Maternal Mortality Ratio; WHO: World Health Organization; SDG:  
278 Sustainable Development Goal; SSA: sub-Saharan Africa; LMICs: Low and Middle-income  
279 countries ; PNG: Papua New Guinea  
280

## 281 **Acknowledgements**

282 We acknowledge Measure DHS for providing us with the data.  
283

284

## 285 **Competing interests**

286 The authors declare that they have no competing interests.  
287

288

## 289 **References**

- 290 1. Brizuela V & Tunçalp Özge. Global initiatives in maternal and newborn health. *Obstet Med.*  
291 2017;10:21–25.
- 292 2. Alkema L, Chou D, Hogan D, *et al.* Global, regional, and national levels and trends in maternal  
293 mortality between 1990 and 2015, with scenario-based projections to 2030: A systematic analysis  
294 by the UN maternal mortality estimation Inter-Agency group. *The Lancet.* 2016;387:462–74.
- 295 3. Bhowmik J, Biswas RK & Woldegiorgis M. Antenatal care and skilled birth attendance in  
296 Bangladesh are influenced by female education and family affordability: BDHS 2014. *Public*  
297 *Health.* 2019;170:113-21.
- 298 4. Badiuzzaman M., Murshed S. M. & Rieger, M. Improving maternal health care in a post  
299 conflict setting: Evidence from Chittagong Hill tracts of Bangladesh. *J Dev Stud.* 2018;36:1-17.
- 300 5. World Health Organization. *Primary health care on the road to universal coverage: 2019*  
301 *global monitoring report.* WHO.2019.
- 302 6. Ahmed I., Ali S. M., Amenga-Etego S., Ariff S., Bahl R., Baqui A. H & Biemba, G. Population-  
303 based rates, timing and causes of maternal deaths, stillbirths, and neonatal deaths in south Asia  
304 and sub-Saharan Africa: a multi-country prospective cohort study. *The Lancet Global*  
305 *Health.*2018;6(12):1297-1308.
- 306 7. Ghana Statistical Service (GSS), Ghana Health Service (GHS), and ICF International. *Ghana*  
307 *Maternal Health Survey 2017: Key Findings.* Rockville, Maryland, USA: GSS, GHS, and ICF  
308 2018.

- 309 8. Koduah A, Van Dijk H & Agyepong IA. The role of policy actors and contextual factors in  
310 policy agenda setting and for- mulation: Maternal fee exemption policies in Ghana over four and  
311 a half decades. *Health Res Pol Syst*. 2015;13: 27.
- 312 9. Wang W, Temsah G & Mallick L. The impact of health insur- ance on maternal health care  
313 utilization: evidence from Ghana, Indonesia and Rwanda. *Health Pol Plann*. 2017: 32: 366–375.
- 314 10. Dankwah E., Zeng W., Feng C., Kirychuck S., & Farag M. The social determinants of health  
315 facility delivery in Ghana. *Reproductive Health*.2019: 16(101)
- 316 11. Ghana Statistical Service, Ghana Health Service, ICF International. Ghana Demographic and  
317 Health Survey, 2014. Rockville, Maryland, USA; 2015.
- 318 12. Abebe F, Berhane Y & Girma B. Factors associated with home delivery in Bahirdar, Ethiopia:  
319 A case control study. *BMC Res Notes*. 2012: 5: 653. <https://doi.org/10.1186/1756-0500-5-653>  
320 PMID: 23176369 .
- 321 13. Enzuladu EA, Agbo HA, Lassa S, Kigbu JH & Zoakah AI. Factors determining the choice of a  
322 place of delivery among pregnant women in Russia village of Jos North, Nigeria: achieving the  
323 MDGs 4 and 5. *Int J Med Biomed Res*. 2013: 2: 23–27.
- 324 14. Ganle, K. K., Mahama, M. S., Maya, E., Manu, A., Torpey, K., & Adanu, R. Understanding  
325 factors influencing home delivery in the context of user- fee abolition in Northern Ghana:  
326 Evidence from 2014 DHS. *International Journal of Health Planning Management*. 2019: 1–17.
- 327 15. Boah M, Adampah T, Jin B, Wan S, Mahama AB, Hyzam D & Akiti, C. “I couldn’t buy the  
328 items so I didn’t go to deliver at the health facility” Home delivery among rural women in northern  
329 Ghana: A mixed-method analysis. *PLoS ONE*. 2020;15(3):0230341. [https://doi.org/10.1371/  
330 journal.pone.0230341](https://doi.org/10.1371/journal.pone.0230341)
- 331 16. Ghana Statistical Service (GSS), Ghana Health Service (GHS), and ICF International. Ghana  
332 Demographic and Health Survey 2014. Rockville: GSS, GHS, and ICF International; 2015.
- 333 17. De Allegri M., Riddle V., Louis V., Sarker M., Trendrebéogo J. & Yé, M. Determinants of  
334 utilization of maternal care services after the reduction of user fee: A case study from rural Burkina  
335 Faso. *Health Policy*.2011: 99: 210-218.
- 336 18. Spangler, S. A. & Bloom, S. S. Use of biomedical obstetric care in rural Tanzania: The role of  
337 social and material inequality. *Social Science and Medicine*. 2010;71(4):760-768.
- 338 19. Adanu, R. M. Utilisation of obstetric services in Ghana between 1999 to 2003. *African Journal  
339 of Reproductive Health*. 2010;14(3):153-158.
- 340 20. Akum, F. A. A qualitative study on factors contributing to low institutional child delivery rates  
341 in Northern Ghana: The case of Bawku Municipality. *J Community Med Health Educ*. 2013: 3(6):  
342 1-9.
- 343 21. Ghana Statistical Service (GSS), Ghana Health Service (GHS), and ICF Macro. Ghana  
344 Demographic and Health Survey 2008. Accra, Ghana: GSS, GHS, and ICF Macro. 2009.
- 345 22. Duysburgh E, Zhang WH, Ye M, *et al*. Quality of antenatal and childbirth care in selected rural  
346 health facilities in Burkina Faso, Ghana and Tanzania: similar finding. *Trop Med Int Health*.  
347 2013;18:534-47.
- 348 23. Karkee R., Binns C. W. & Lee A. H. Determinants of facility delivery after implementation of  
349 safer mother programme in Nepal: A prospective cohort study. *BMC Pregnancy Childbirth*.  
350 2013;13:193.
- 351 24. Gebrehiwot T, San Sebastian M, Edin K, *et al*. Health workers' perceptions of facilitators of  
352 and barriers to institutional delivery in Tigray, Northern Ethiopia. *BMC Pregnancy  
353 Childbirth*.2014;14:1-10.

354 25. Morrison J, Thapa R, Basnet M, *et al.* Exploring the first delay: A qualitative study of home  
355 deliveries in Makwanpur district Nepal. *BMC Pregnancy Childbirth.* 2014;14:89.

356 26. De Brouwere, V., Richard, F. & Witter, S. Access to maternal and perinatal health services:  
357 lessons from successful and less successful examples of improving access to safe delivery and care  
358 of the newborn. *Trop Med Int Health* 2015;15:901–9.

359 27. Shahabuddin A. S. M., De Brouwere V., Adhikari R., Delamou A., Bardaj A. & Delvaux, T.  
360 Determinants of institutional delivery among young married women in Nepal: Evidence from the  
361 Nepal Demographic and Health Survey. *BMJ Open.* 2017;7:012446. doi:10.1136/bmjopen-2016-  
362 012446.

363 28. Palamuleni, M. Determinants of non-institutional deliveries in Malawi. *Malawi Medical*  
364 *Journal.* 2011: 23(4): 104-108.

365 29. Yaya S., Bishwajit G. & Gunawardena N. Socioeconomic factors associated with choice of  
366 delivery place among mothers: A population-based cross-sectional study in Guinea-Bissau. *BMJ*  
367 *Glob Health.* 2019: 4:001341. doi:10.1136/bmjgh-2018-001341

368 30. Wagle R. R., Sabroe S. & Nielsen B. B. Socioeconomic and physical distance to the maternity  
369 hospital as predictors for place of delivery: An observation study from Nepal. *BMC Pregnancy*  
370 *Childbirth.* 2004: 4.

371 31. Agha S. & Carton T. W. Determinants of institutional delivery in rural Jhang, Pakistan. *Int J*  
372 *Equity Health.* 2011:10.

373 32. Kitui J., Lewis S. & Davey G. Factors influencing place of delivery for women in Kenya: An  
374 analysis of the Kenya demographic and Health survey, 2008/2009. *BMC Pregnancy Childbirth.*  
375 2013: 13.

376 33. Dahiru T. & Oche O. M. Determinants of antenatal care, institutional delivery and postnatal  
377 care services utilization in Nigeria. *Pan African Medical Journal.* 2015: 21(321):2-9.  
378 doi:10.11604/pamj.2015.21.321.6527

379 34. Pervin J, Moran A, Rahman M, Abdur Razzaque, Sibley L, Streatfield PK *et al.* Association  
380 of antenatal care with facility delivery and perinatal survival- a population-based study in  
381 Bangladesh. *BMC Pregnancy and Childbirth.* 2012;12:111.

382 35. Banke-Thomas O. E., Banke-Thomas A. O. & Ameh C. A. Factors influencing utilisation of  
383 maternal health services by adolescent mothers in Low-and middle-income countries: A systematic  
384 review. *BMC Pregnancy and Childbirth.* 2017;17(65):1-14. DOI 10.1186/s12884-017-1246-3

385 36. Rahman M. & Mosiur R. Deliveries among adolescent mothers in rural Bangladesh: Who  
386 provides assistance? *World Health Popul.* 2009;11:5–14. [http:// ovidsp. ovid. com/ ovidweb. cgi? T= JS& PAGE=reference& D= med5& NEWS= N& AN= 20057269](http://ovidsp.ovid.com/ovidweb.cgi?T=JS&PAGE=reference&D=med5&NEWS=N&AN=20057269)

387 37. Kamal S. M. Preference for institutional delivery and caesarean sections in Bangladesh. *J*  
388 *Health Popul Nutr.* 2013: 31:96-109.

390 38. Feyissa T. R. & Genemo G. A. Determinants of institutional delivery among childbearing age  
391 women in western Ethiopia, 2013: Unmatched case control study. *PLoSOne.* 2014;9:97194–7.

392 39. Berhan Y. & Berhan A. Antenatal care as a means of increasing birth in the health facility and  
393 reducing maternal mortality: A systematic review. *Ethiop J Health Sci.* 2014: 24: 93-104.

394 40. Ghimire U. The effect of maternal health service utilization in early initiation of breastfeeding  
395 among Nepalese mothers. *International Breastfeeding Journal.* 2019;14(33):2-8.  
396 <https://doi.org/10.1186/s13006-019-0228-7>.

397 41. Bandura A. Self-efficacy: Toward a unifying theory of behavioural change. *Psychological*  
398 *Review.* 1997;84:191-215.

399 42. Floyd D. L., Prentice-Dunn S. & Rogers R. W. A meta-analysis of research on protection  
400 motivation theory. *Journal of Applied Social Psychology*. 2000: 30: 407-429.  
401 43. MacDonell K., Chen X., Yan Y., Li F., Gong J., Sun H., Li X. & Stanton B. A protection  
402 motivation theory-based scale for tobacco research among Chinese youth. *Journal of Addiction*  
403 *Research and Therapy*. 2013:4(3): 2-7.  
404 44. Oyedele, O. Determinants of maternal healthcare utilization in Nigeria. *African Research*  
405 *Review*.2017: 11(2):283-293.

406  
407  
408  
409  
410  
411  
412  
413  
414  
415  
416  
417  
418  
419  
420  
421  
422  
423  
424

**Table 1: Weighted distribution of the prevalence of home deliveries among women in the urban areas of Ghana across socio-demographic characteristics (N=1,441)**

| Variable          | Frequency (N) | Percentage (%) | Home delivery (%) | $\chi^2$ (p-value) |
|-------------------|---------------|----------------|-------------------|--------------------|
| <b>Age</b>        |               |                |                   | 0.57 (0.75)        |
| 15-24             | 174           | 12.1           | 15.5              |                    |
| 25-34             | 787           | 55.6           | 53.5              |                    |
| 35 years or more  | 481           | 33.4           | 31.0              |                    |
| <b>Region</b>     |               |                |                   | 101.64 (p<0.001)   |
| Western           | 109           | 7.5            | 4.9               |                    |
| Central           | 107           | 7.4            | 11.3              |                    |
| Greater Accra     | 437           | 30.4           | 5.6               |                    |
| Volta             | 80            | 5.6            | 12.0              |                    |
| Eastern           | 118           | 8.2            | 7.0               |                    |
| Ashanti           | 333           | 23.1           | 7.8               |                    |
| Brong Ahafo       | 116           | 8.1            | 9.1               |                    |
| Northern          | 94            | 6.5            | 33.8              |                    |
| Upper East        | 31            | 2.1            | 7.0               |                    |
| Upper West        | 15            | 1.0            | 1.4               |                    |
| <b>Occupation</b> |               |                |                   | 0.04 (0.840)       |
| Working           | 238           | 16.5           | 18.3              |                    |
| Not working       | 1203          | 83.5           | 81.7              |                    |



|                                   |       |      |      |                  |
|-----------------------------------|-------|------|------|------------------|
| <b>Ethnicity</b>                  |       |      |      | 16.32 (p<0.001)  |
| Akan                              | 748   | 51.9 | 29.6 |                  |
| Ga/Dangme                         | 131   | 9.1  | 4.2  |                  |
| Mole Dagbani                      | 235   | 16.1 | 39.4 |                  |
| Other                             | 359   | 22.8 | 26.8 |                  |
| <b>Educational level</b>          |       |      |      | 130.98 (p<0.001) |
| No education                      | 222   | 15.4 | 54.9 |                  |
| Primary                           | 212   | 14.7 | 23.2 |                  |
| Secondary/Higher                  | 1,007 | 69.9 | 21.8 |                  |
| <b>Wealth index</b>               |       |      |      | 153.31 (p<0.001) |
| Poorest                           | 67    | 4.7  | 26.1 |                  |
| Poorer                            | 80    | 5.5  | 23.2 |                  |
| Middle                            | 232   | 16.1 | 29.6 |                  |
| Richer                            | 443   | 30.7 | 15.5 |                  |
| Richest                           | 619   | 43.0 | 5.6  |                  |
| <b>Parity</b>                     |       |      |      | 30.30 (p<0.001)  |
| One birth                         | 292   | 20.3 | 8.5  |                  |
| Two births                        | 364   | 25.2 | 17.6 |                  |
| Three births                      | 299   | 20.8 | 21.1 |                  |
| Four or more births               | 486   | 33.7 | 52.8 |                  |
| <b>Religion</b>                   |       |      |      | 88.46 (p<0.001)  |
| Christianity                      | 1151  | 79.9 | 45.8 |                  |
| Islam                             | 247   | 17.1 | 40.1 |                  |
| Other                             | 43    | 3.0  | 8.5  |                  |
| <b>Marital status</b>             |       |      |      | 0.72 (0.397)     |
| Married                           | 1084  | 75.2 | 75.3 |                  |
| Cohabiting                        | 357   | 24.8 | 24.7 |                  |
| <b>Sex of household head</b>      |       |      |      | 0.68 (0.411)     |
| Male                              | 1141  | 79.1 | 77.5 |                  |
| Female                            | 300   | 20.9 | 22.5 |                  |
| <b>ANC visits</b>                 |       |      |      | 50.48 (p<0.001)  |
| No ANC visits                     | 16    | 1.1  | 7.0  |                  |
| Had ANC visit                     | 1425  | 98.9 | 93.0 |                  |
| <b>Healthcare decision-making</b> |       |      |      | 0.18 (0.675)     |
| Not alone                         | 1035  | 71.8 | 76.1 |                  |
| Respondent alone                  | 406   | 28.2 | 23.9 |                  |
| National (Total)                  | 1,441 | 100  | 7.9  |                  |

425  
426  
427  
428  
429  
430  
431

**Source: Computed from 2014 GDHS**

432 **Table 2: Logistic regression analysis on predictors of home delivery among women in the**  
 433 **urban areas of Ghana**

| Variable              | AOR        | 95% CI      |             |
|-----------------------|------------|-------------|-------------|
|                       |            | Lower Bound | Upper Bound |
| <b>Region</b>         |            |             |             |
| Western               | 0.63       | 0.20        | 2.01        |
| Central               | 0.74       | 0.29        | 1.87        |
| Greater Accra         | 0.42       | 0.14        | 1.28        |
| Volta                 | 0.80       | 0.34        | 1.90        |
| Eastern               | 0.54       | 0.21        | 1.38        |
| Ashanti               | 0.59       | 0.23        | 1.49        |
| Brong Ahafo           | 0.38*      | 0.17        | 0.84        |
| Northern              | <b>Ref</b> | <b>Ref</b>  | <b>Ref</b>  |
| Upper East            | 0.26**     | 0.11        | 0.60        |
| Upper West            | 0.15**     | 0.04        | 0.62        |
| <b>Ethnicity</b>      |            |             |             |
| Akan                  | 1.39       | 0.69        | 2.79        |
| Ga/Dangme             | 1.71       | 0.55        | 3.36        |
| Mole Dagbani          | <b>Ref</b> | <b>Ref</b>  | <b>Ref</b>  |
| Other                 | 0.86       | 0.48        | 1.56        |
| <b>Education</b>      |            |             |             |
| No education          | <b>Ref</b> | <b>Ref</b>  | <b>Ref</b>  |
| Primary               | 0.80       | 0.46        | 1.40        |
| Secondary/Higher      | 0.30***    | 0.17        | 0.53        |
| <b>Wealth</b>         |            |             |             |
| Poorest               | 2.02*      | 1.06        | 3.86        |
| Poorer                | 1.84       | 0.99        | 3.41        |
| Middle                | <b>Ref</b> | <b>Ref</b>  | <b>Ref</b>  |
| Richer                | 0.38***    | 0.21        | 0.68        |
| Richest               | 0.18***    | 0.08        | 0.42        |
| <b>Parity</b>         |            |             |             |
| One birth             | 0.52       | 0.26        | 1.02        |
| Two births            | 0.96       | 0.54        | 1.69        |
| Three births          | 1.36       | 0.80        | 2.31        |
| Four or more births   | <b>Ref</b> | <b>Ref</b>  | <b>Ref</b>  |
| <b>Religion</b>       |            |             |             |
| Christianity          | <b>Ref</b> | <b>Ref</b>  | <b>Ref</b>  |
| Islam                 | 0.97       | 0.53        | 1.75        |
| Other                 | 3.45***    | 1.53        | 7.81        |
| <b>ANC visits</b>     |            |             |             |
| No ANC visits         | 7.17**     | 1.64        | 31.3        |
| Had ANC visit         | <b>Ref</b> | <b>Ref</b>  | <b>Ref</b>  |
| N                     | 1441       |             |             |
| Pseudo R <sup>2</sup> | 0.259      |             |             |

434

435 Exponentiated coefficients; 95% confidence intervals in brackets, \*  $p < 0.05$ , \*\*  $p < 0.01$ , \*\*\*  $p <$   
436 0.001, aOR=adjusted Odds Ratios  
437  
438
